# Supplementary material for: Pre-analytical and analytical confounders of serum calprotectin as a biomarker in rheumatoid arthritis
Source: publisher site journal article supplement (doi:10.1515/cclm-2019-0508), 2019-10-30
Supplement: Supplementary file 1 [file Table S1_20191006.docx]

**Supplemental data Table S1. Calprotectin assay characteristics**

| **Assay** | **Antibody** | | **Extraction**  **dilution** | **No. of calibrators** | **Measuring principle** | **Measuring** | **Reference values, µg/mL** |
| --- | --- | --- | --- | --- | --- | --- | --- |
| **Capture** | **Detection** | **range, µg/mL** |
| **MRP8/14 ELISA** | Monoclonal, *nr* | Monoclonal, *nr* | 1:100b | 5 | ELISA | 0.4-24.0 | 1.14-2.9e |
| **Calprotectin Liaison assaya** | Monoclonal, mouse | Monoclonal, mouse | 1:5c | 2 | CLIA | 0.1-84.2**d** | *nr* |
| **Calprotectin Extended range ELISAa** | Polyclonal, rabbit | Monoclonal, mouse | 1:400b | 6 | ELISA | 0.6-60.0**d** | *nr* |
| **EliA Calprotectin2a** | Monoclonal, mouse | Monoclonal, mouse | 1:50b | 6 | FEIA | 0.1-75.0**d** | *nr* |

a serum/plasma application for research only; b dilution performed by an automated instrument;c dilution performed manually; d the measuring range of the serum/plasma application for research only is derived from the fecal calprotectin application; e 95th percentile for healthy blood donors

Abbreviations: ELISA, Enzyme Linked Immunosorbent assay; CLIA, Chemiluminescence Immunoassay; FEIA, Fluoro Enzyme Immuno Assay; LOQ, Limit of Quantification; *nr*, not reported
