# Supplementary material for: Pre-analytical and analytical confounders of serum calprotectin as a biomarker in rheumatoid arthritis
Source: publisher site journal article supplement (doi:10.1515/cclm-2019-0508), 2019-10-30
Supplement: Supplementary file 2 [file Table S2_20191006.docx]

**Supplemental data Table S2.**

Imprecision analysis of serum calprotectin assays: mean (µg/mL) serum calprotectin and total imprecision (%) for the specific kit-controls and the patient control samples.

|  | **Kit-controls** | | | | **Patient samplesb** | | | |
| --- | --- | --- | --- | --- | --- | --- | --- | --- |
|  | **Low** | | **High** | | **Medium** | | **High** | |
|  | **Mean,**  **µg/mL** | **CV,**  **%** | **Mean,**  **µg/mL** | **CV,**  **%** | **Mean,**  **µg/mL** | **CV,**  **%** | **Mean,**  **µg/mL** | **CV,**  **%** |
| **MRP8/14 ELISA** | 2.0 | 20.3 | 5.8 | 17.0 | 7.0 | 28.6 | 11.2 | 31.4 |
| **Calprotectin Liaison assaya** | 0.7 | 5.0 | 3.1 | 10.7 | 3.8 | 14.0 | 5.9 | 13.9 |
| **Calprotectin Extended range ELISAa** | 5.3 | 7.6 | 28.9 | 10.3 | 3.0 | 15.2 | 5.2 | 14.3 |
| **EliA Calprotectin 2a** | 0.1 | 9.2 | 1.1 | 9.3 | 4.2 | 5.5 | 7.1 | 6.0 |

a Serum application for research use only; b Different aliquots of medium and high serum samples were stored at -20°C and thawed right before analysis.
