# Supplementary material for: Pre-analytical and analytical confounders of serum calprotectin as a biomarker in rheumatoid arthritis
Source: publisher site journal article supplement (doi:10.1515/cclm-2019-0508), 2019-10-30
Supplement: Supplementary file 3 [file Table S3_20191006.docx]

**Supplemental data Table S3.**

Method comparison of different serum calprotectin assays: Pearson correlation (r), Bland-Altman analysis (mean differences (µg/mL), and Passing and Bablok Regression analysis (intercept and slope). The 95% confidence intervals are indicated in brackets.

|  | **MRP8/14 ELISA** | **Calprotectin Liaison assaya** | **Calprotectin Extended range ELISAa** |
| --- | --- | --- | --- |
| **Calprotectin Liaison assaya** |  |  |  |
| **r** | 0.871 (0.847-0.892) |  |  |
| **Mean difference** | - 2.0 (-2.2- -1.7) |  |  |
| **Intercept** | - 0.78 (-1.02- -0.54) |  |  |
| **Slope** | 2.20 (2.04-2.37) |  |  |
| **Calprotectin Extended range ELISAa** |  |  |  |
| **r** | 0.889 (0.868-0.906) | 0.950 (0.940-0.958) |  |
| **Mean difference** | -2.2 (-2.4- -1.9) | 0.2 (0.1-0.3) |  |
| **Intercept** | - 0.73 (-0.97- -0.52) | - 0.02 (-0.07-0.03) | |
| **Slope** | 2.42 (2.27-2.60) | 0.87 (0.83-0.90) |  |
| **EliA Calprotectin 2a** |  |  |  |
| **r** | 0.898 (0.879-0.915) | 0.963 (0.956-0.969) | 0.969 (0.962-0.974) |
| **Mean difference** | -1.7 (-1.9- -1.5) | 0.2 (0.1-0.3) | 0.5 (0.4-0.5) |
| **Intercept** | -0.06 (-0.21-0.10) | 0.30 (0.27-0.34) | 0.25 (0.22-0.27) |
| **Slope** | 1.68 (1.59-1.80) | 0.82 (0.79-0.84) | 0.69 (0.67-0.70) |

a serum application for research only
