# Supplementary material for: Pre-analytical and analytical confounders of serum calprotectin as a biomarker in rheumatoid arthritis
Source: publisher site journal article supplement (doi:10.1515/cclm-2019-0508), 2019-10-30
Supplement: Supplementary file 4 [file Table S4_20191006.docx]

**Supplemental data Table S4.**

Sensitivity, specificity, positive likelihood ratio and negative likelihood ratio of the (combination of) biomarkers rheumatoid factor, anti-cyclic citrullinated antibodies, C-reactive protein (CRP; at cut-off of the healthy population (3 mg/L) and cut-off at 97.5% specificity (50 mg/L) and serum calprotectin (EliA Calprotectin 2a Thermo Fisher Scientific assay; at cut-off of the healthy population (2 µg/mL) and cut-off at 97.5% specificity (6 µg/mL)) in the diagnosis of rheumatoid arthritis.

|  | **Sensitivity % (95% CI)** | **Specificity %**  **(95% CI)** | **LR +**  **(95% CI)** | **LR –**  **(95% CI)** |
| --- | --- | --- | --- | --- |
| **RF** | 42.3  (33.0-52.1) | 95.5  (92.7-97.4) | 9.3  (5.5-15.8) | 0.60  (0.51-0.71) |
| **ACPA** | 43.2  (33.9-52.9) | 99.4  (98.0-99.9) | 76.1  (18.8-308.1) | 0.57  (0.49-0.67) |
| **RF or ACPA** | 48.7  (39.1-58.3) | 95.2  (92.4-97.2) | 10.1  (6.1-16.6) | 0.54  (0.45-0.65) |
| **Calprotectina**  **(cut-off 2 µg/mL)** | 74.8  (65.7-82.5) | 62.5  (57.2-67.6) | 2.0  (1.68-2.37) | 0.40  (0.29-0.56) |
| **Calprotectina**  **(cut-off 5.4 µg/mL)** | 22.5  (15.1-31.4) | 98.0  (96.0-99.2) | 11.3  (5.0-25.5) | 0.79  (0.91-0.87) |
| **CRP**  **(cut-off 3 mg/L)** | 73.0  (63.7-61.0) | 66.2  (61.6-71.1) | 2.2  (1.8-2.6) | 0.41  (0.30-0.56) |
| **CRP**  **(cut-off 50 mg/L)** | 8.1  (3.8-14.8) | 97.3  (95.6-99.0) | 3.6  (1.4-9.0) | 0.94  (0.89-1.00) |
| **RF or ACPA or calproa (cut-off 2 µg/mL)** | 90.1  (83.0-95.0) | 59.9  (54.6-65.1) | 2.3  (2.0-2.6) | 0.17  (0.09-0.29) |
| **RF or ACPA or calproa (cut-off 5.4 µg/mL)** | 63.1  (53.4-72.0) | 92.3  (89.0-94.9) | 8.2  (5.6-12.1) | 0.40  (0.31-0.51) |
| **RF or ACPA or CRP**  **(cut-off 3 mg/L)** | 88.3  (80.8-93.6) | 63.6  (58.4-68.7) | 2.4  (2.1-2.8) | 0.18  (0.11-0.31) |
| **RF or ACPA or CRP**  **(cut-off 50 mg/L)** | 56.8  (47.0-66.1) | 92.9  (89.7-95.4) | 8.0  (5.3-12.1) | 0.47  (0.38-0.58) |

Abbreviations: CI, confidence interval; CRP, C-reactive protein (Cobas c502, Roche; positive test result > 5 mg/L); RF, rheumatoid factor (EliA RF IgM; Phadia 250; Thermo Fisher Scientific; positive test result > 5 U/mL); ACPA, anti-cyclic citrullinated peptide antibodies (EliA CCP; Phadia 250; Thermo Fisher Scientific; positive results > 5 U/mL)

**a** serum application for research use only
